## Transmission of SARS-CoV-2 in Georgia, USA, 2020

Kamalich Muniz-Rodriguez, MPH; Gerardo Chowell, PhD; Jessica S. Schwind, PhD; Randall Ford, DDS; Sylvia K. Ofori, MPH; Chigozie A. Ogwara, BS; Margaret R. Davies, BS; Terrence Jacobs, BS; Chi-Hin Cheung, MS; Logan T. Cowan, PhD; Andrew R. Hansen, DrPH; Isaac Chun-Hai Fung\*, PhD

Author affiliations: Department of Biostatistics, Epidemiology and Environmental Health Sciences, Jiann-Ping Hsu College of Public Health, Georgia Southern University, Statesboro, GA (Ms. Muniz-Rodriguez, Ms. Ofori, Dr. Schwind, Ms. Ogwara, Ms. Davies, Mr. Jacobs, Dr. Cowan, Dr. Fung); Department of Community Health and Health Policy, Jiann-Ping Hsu College of Public Health, Georgia Southern University, Statesboro, GA (Dr. Ford, Dr. Hansen); Department of Population Health Sciences, School of Public Health, Georgia State University, Atlanta, GA (Dr. Chowell); Independent researcher, Hong Kong (Mr. Cheung)

Authors ORCID: 0000-0002-4786-9438 (K. Muniz-Rodriguez); 0000-0003-2194-2251 (G. Chowell); 0000-0002-2056-0182 (J. S. Schwind); 0000-0002-6811-4464 (R. Ford); 0000-0002-9961-9975 (S. K. Ofori); 0000-0001-7418-0153 (C. A. Ogwara); 0000-0002-2447-4767 (C.-H. Cheung); 0000-0002-0462-7041 (L. T. Cowan); 0000-0001-5496-2529 (I. C.-H. Fung)

\*Correspondence should be addressed to: Dr. Isaac Chun-Hai Fung, Department of Biostatistics, Epidemiology and Environmental Health Sciences, Jiann-Ping Hsu College of Public Health, P.O. Box 7989, Georgia Southern University, Statesboro, GA 30460-7989, USA. Telephone: 912-478-5079. Email: [cfung@georgiasouthern.edu](mailto:cfung@georgiasouthern.edu)

Author contributions

Authors Muniz-Rodriguez and Chowell contribute equally as co-first authors.

Word count: 1962

Abstract: 200

## ABSTRACT

**Objective:** SARS-CoV-2 has significantly impacted Georgia, USA including two major hotspots, Metro Atlanta and Dougherty County in southwestern Georgia. With government deliberations about relaxing social distancing measures, it is important to understand the trajectory of the epidemic in the state of Georgia.

**Methods:** We collected daily cumulative incidence of confirmed COVID-19 cases in Georgia. We estimated the reproductive number ( $R_e$ ) of the COVID-19 epidemic on April 18 and May 2 by characterizing the initial growth phase of the epidemic using the generalized-growth model.

**Results:** The data presents a sub-exponential growth pattern in the cumulative incidence curves. On April 18, 2020,  $R_e$  was estimated as 1.20 (95% CI: 1.10, 1.20) for the state of Georgia, 1.10 (95% CI: 1.00, 1.20) for Dougherty County, and 1.20 (95% CI: 1.10, 1.20) for Metro Atlanta. Extending our analysis to May 2, 2020,  $R_e$  estimates decreased to 1.10 (95% CI: 1.10, 1.10) for the state of Georgia, 1.00 (95% CI: 1.00, 1.10) for Dougherty County, and 1.10 (95% CI: 1.10, 1.10) for Metro Atlanta.

**Conclusions:** Transmission appeared to be decreasing after the implementation of social distancing measures. However, these results should be interpreted with caution when considering relaxing control measures due to low testing rates.

**Key Words:** Coronavirus, COVID-19, Effective Reproduction number, Infectious Disease Transmission, SARS-CoV-2

## INTRODUCTION

In 2020, the pandemic of coronavirus disease 2019 (COVID-19), caused by severe acute respiratory syndrome coronavirus 2 (SARS-CoV-2), impacted the state of Georgia (GA) as in other areas of the United States. Georgia ranked twelve out of fifty states and ten territories of the United States in terms of COVID-19 confirmed cases as of April 18, 2020.<sup>1</sup> Metro Atlanta counties, Clayton, Cobb, DeKalb, Fulton, Gwinnett and Hall, were COVID-19 hotspots.<sup>2</sup> Dougherty County, with Albany as the county seat, in southeast GA also reported a large number of cases (as of May 4, 2020:  $n=1,543$ ,  $IR=1716.26$  per 100,000 individuals).<sup>2</sup> In GA, every county government has the power to impose preventive measures to reduce viral transmission as they see fit, before the state imposes a state-wide emergency that overrides autonomy of county governments (Figure 1, Table S1). On March 23, 2020, the GA State Government issued an executive order requesting citizens with underlying conditions and those with a COVID-19 diagnosis to shelter-in-place.<sup>3</sup> Certain businesses were to remain closed and no more than 10 individuals could gather in a location without maintaining a distance of at least six feet. The order also called for restaurants to offer only curbside pick-ups or deliveries.<sup>3</sup> On April 2, 2020, a state-wide shelter-in-place ordinance was enacted by the Governor allowing only essential services to operate.<sup>3</sup> The GA State Government announced on April 27, 2020 during a press conference that services, such as beauty salons, barber shops, stores, and restaurants, can reopen if they follow pertinent social distancing measures specified by the state.<sup>3</sup> As the COVID-19 epidemic in GA continues, it is important to quantify the epidemiologic characteristics of COVID-19 to minimize transmission and mortality.

To characterize the transmission potential of an epidemic, it is necessary to calculate the reproduction number based on confirmed cases or deaths.<sup>4</sup> The basic reproduction number,  $R_0$ , is the average number of secondary cases that one primary case can generate in a completely susceptible population in the absence of behavioral changes or public health interventions.<sup>4</sup> The estimated values of the  $R_0$  for SARS-CoV-2 vary across geographic locations. An early study of the epidemic in Wuhan reported a  $R_0$  of 2.2 (assuming serial interval of 7.5).<sup>5</sup> A more recent study of the epidemic in China, adjusted for the changing case definition, estimated  $R_0$  of 1.8-2.0 (assuming serial interval of 7.5) or 1.4-

1.5 (assuming serial interval of 4.7).<sup>6</sup> Our analysis of confirmed COVID-19 cases in Iran estimated the mean  $R_0$  as 3.5 or 4.4, depending on the statistical method (assuming serial interval of 4.4).<sup>7</sup>

The effective reproduction number,  $R_e$ , in contrast, is a time-dependent estimate of the secondary cases that arise from one case in a population with control measures in place.<sup>4</sup> If  $R_e > 1$ , it indicates that there is sustainable transmission in the population. When the  $R_e < 1$ , the transmission of the disease cannot be sustained, and it is used as an indication of effectiveness of infection control measures.<sup>4</sup>

This study aims to estimate the  $R_e$  for COVID-19 in GA, Dougherty County and Metro Atlanta counties on April 18 and May 2, 2020, ½ and 1 month, respectively, after the state mandated a state-wide shelter-in-place order on April 2, 2020. We estimated  $R_e$  by characterizing the growth pattern in daily case incidence using a generalized growth model (GGM).

## **METHODS**

This study covers the COVID-19 epidemic, March 2 — May 2, 2020, in the state of GA, Dougherty County, and all Metro Atlanta counties (Tables S2-S8). Metro Atlanta is defined by the United States Office of Management and Budget as the Atlanta-Sandy Springs-Alpharetta, Georgia Metropolitan Statistical Area.<sup>8</sup> The list of Metro Atlanta counties is provided in Appendix Table 2 in blue.

### **Data acquisition**

We downloaded the cumulative data of confirmed cases and deaths during March 2 — May 2, 2020, for the entire state of GA and its counties from the New York Times GitHub data repository.<sup>9</sup> Every location in our study has a start date corresponding to the first reported case for the area according to the New York Times. The first case in GA was reported on March 2, 2020.<sup>9</sup> Our cutoff point for all locations was May 2, 2020, four weeks after the shelter-in-place order was implemented by the GA State Government.<sup>3</sup>

We verified the numbers with official statistical reports from the Georgia Department of Public Health (GA-DPH).<sup>2</sup> If any inconsistencies were found, the numbers from the GA-DPH were used as the standard. To conduct the GGM Method, we transformed the cumulative numbers into daily number of

cases reported to obtain daily SARS-CoV-2 incidence. We also searched the local government pages to verify if any control measures were established. If any information was identified, it was included and considered during our analyses. See Appendix (Tables S1-S8) for details.

### Statistical analyses

Our GGM characterizes the COVID-19 daily incidence using the growth rate,  $r$ , and a scaling factor,  $p$ , as its parameters. The GGM model allows epidemiologists to measure multiple epidemic profiles, including constant incidence, sub-exponential growth, and exponential growth.<sup>10</sup> The GGM is represented by  $dC(t)/dt = C'(t) = rC(t)^p$ , where  $C'(t)$  corresponds to the incidence curve over time;  $C(t)$  describes the cumulative incidence over time  $t$ ;  $r$  is the growth rate (1/time) and  $p$  is the scaling factor fitting sub-exponential growth.<sup>10,11</sup> The scaling factor of GGM,  $p$ , represents exponential growth if  $p = 1$ , sub-exponential growth or polynomial growth if  $0 < p < 1$ , and constant growth if  $p = 0$ . To estimate the  $R_e$  at a specific time, we linked the GGM model fit to the renewal equation that estimates the temporal changes in the effective reproduction number using a discretized probability distribution ( $\rho_i$ ) of the serial interval, namely,  $R_{t_i} = \frac{I_i}{\sum_{j=0}^i (I_{i-j})\rho_i}$ . In the renewal equation we denote the total incidence at calendar time  $t_i$  by  $I_i$ . Here the denominator represents the total number of cases contributing to the new reported cases at time  $t_i$ . We simulated 300 curves to estimate uncertainty boundaries.<sup>10,11</sup> Because the time series of incident cases displays overdispersion, we assumed a negative binomial error structure underlying the data points (Table S9).<sup>11</sup> The choice of the scaling parameter of the negative binomial distribution, i.e. the ratio of variance / mean, was manually explored (from 1, 2, 5 and then in the increments of 5) to achieve the lowest variance possible with at least 85% of the data points covered by the 95% prediction interval. The serial interval is assumed to follow a gamma distribution with a mean = 4.41 days, and standard deviation = 3.17 days.<sup>12,13</sup>

To estimate the  $R_e$  at two different time points, we analyzed two different timeframes from March 2, 2020 to April 18, 2020 and March 2, 2020 to May 2, 2020. Statistical significance was defined a priori

at  $\alpha = 0.05$ . Our analyses were conducted in MATLAB R2019B (MathWorks, Natick, MA) and R Version 1.2.1335 Macintosh (R Core Team, Vienna, Austria).

## RESULTS

As social distancing measures unfolded in GA during our study period (March 2 – May 2, 2020), the SARS-CoV-2  $R_e$  decreased from 1.20 (95% CI: 1.10, 1.20) on April 18 to 1.10 (95% CI: 1.10, 1.10) on May 2. Roughly, that means that on May 2, for every 10 infectious individuals, 11 secondary cases would appear in the next generation of transmission. The epidemic growth in GA was sub-exponential by May 2, with a GGM scaling parameter of 0.51 (95% CI: 0.45, 0.56). The  $R_e$  estimates for Metro Atlanta decreased from 1.20 (95% CI: 1.10, 1.20) on April 18 to 1.10 (95% CI: 1.10, 1.10) on May 2. These results indicate sustained transmission of SARS-CoV-2 in Metro Atlanta as of May 2. In Dougherty County, we estimated an  $R_e$  of 1.10 (95% CI: 1.00, 1.20) on April 18, and it decreased to 1.00 (95% CI: 1.00, 1.10) on May 2 (Figure 2, Table S9). Among the 30 counties investigated on May 2, 2020, 18 had an  $R_e$  with a 95% confidence interval including 1.00 according to GGM, presenting the possibility of epidemic stabilization. Hall and Jasper Counties presented the highest reproductive numbers of 1.40 (Figure 2, Table S9).

## DISCUSSION

Community transmission of SARS-CoV-2 remained ongoing in GA, with  $R_e \geq 1$ , on May 2, 2020. On April 24, GA reopened some sectors of the economy, with specific guidelines pertinent to social distancing.<sup>3</sup> Nevertheless, given the ongoing SARS-CoV-2 transmission, it is likely we will observe an increase in daily number of new confirmed cases if increased unprotected social mixing ensues as the economy reopens. Social distancing resulted in an  $R_e$  range between 1.0 and 1.4 for a virus that has a reported  $R_0 > 2$ .<sup>5,7</sup> Our estimates concur with those published by Gunzler and Sehgal, where they observed a decline in the mean reproductive number from 4.02 to 1.51 after control measures were implemented in

the United States.<sup>14</sup> Based on our results as of May 2, 2020, it will be wise if residents in Georgia continue to maintain social distancing measures to slow the epidemic.

We also observed on May 2, 2020, that 1 month since the beginning of the shelter-in-place order in Georgia on April 2, the estimate of the number of secondary cases arising from one infected individual with control measures in place remain  $\geq 1$ . For all the locations we studied, none of them experienced a decline in the epidemic with an  $R_e < 1$  (Appendix Figure S4). Three counties, Bartow, Carroll and Rockdale, had an  $R_e = 1$  on May 2, indicating the epidemic therein may have reached its peak or plateau.<sup>4</sup> Estimates of the  $R_e$  and the curve of log-transformed cumulative incidence curve indicates the effectiveness of the control measures implemented by state and local governments. However, the uncertainty in our estimates suggests that the epidemic has yet to be suppressed. Therefore, control measures should stay in place until the  $R_e$  is  $< 1$  (Figure 2, Appendix Table 9).

Furthermore, many residents in both rural and urban GA are medically vulnerable. A recent analysis by The Surgo Foundation estimated the COVID-19 community vulnerability index (CCVI) for Dougherty County, by combining epidemiologic risk factors for infection and sociodemographic factors, at very high levels (CCVI = 0.87) when compared with counties in Metro Atlanta (Fulton county's CCVI = 0.42).<sup>15</sup> Despite the  $R_e$  estimate for Dougherty County being equal to 1.00 (95% CI: 1.00, 1.10), the relaxation of social distancing measures should be implemented with an abundance of caution due to the population's vulnerability. Another important factor for consideration is access to healthcare and surge capacity in hospitals, especially in rural GA. The healthcare system in Dougherty County was hard hit by the surge of COVID-19 patients. Even in Metro Atlanta, the Georgia World Congress Center, had to be converted into a field hospital.

While economic factors are legitimate concerns for decisionmakers, the risk of reopening the economy too soon, leading to the resurgence of COVID-19 cases in GA, is substantial. Further research into the spatiotemporal variation of SARS-CoV-2 transmission potential and its association with economic and medical vulnerability will shed light on the disease and economic burden of COVID-19 in GA.



## **Limitations**

Our study is limited by several factors. First, data was analyzed by reported date and not day of symptom onset. Second, our data does not differentiate between imported and community transmission cases. Third, cases may be underreported due to limited testing capacity, or they may be mild or asymptomatic cases. Fourth, our analysis is right censored by May 2, 2020. Future studies can further extend the analysis as the pandemic progresses.

## **CONCLUSION**

Social distancing measures reduced the transmission of SARS-CoV-2 in GA. However, the epidemic has not yet been suppressed;  $R_e \geq 1$  for GA, for all Metro Atlanta counties and for Dougherty County from the date of their first reported case to May 2, 2020. Government agencies should carefully consider the next steps of their COVID-19 plans for their communities considering that transmission is still possible in some of their counties.

## **Acknowledgement**

GC acknowledges support from NSF grant 1414374 as part of the joint NSF-NIH-USDA Ecology and Evolution of Infectious Diseases program. ICHF acknowledges salary support from the National Center for Emerging and Zoonotic Infectious Diseases, Centers for Disease Control and Prevention (19IPA1908208). This article is not part of ICHF's CDC-sponsored projects.

## **Conflict of interest statement**

We do not have any conflict of interest to declare.

## **Disclaimer**

This article does not represent the official positions of the Centers for Disease Control and Prevention, the National Institutes of Health, or the United States Government.

## Ethics statement

The Georgia Southern University Institutional Review Board has made a non-human subjects determination for our project (H20364), under G8 exemption category.

## References

1. Centers for Disease Control and Prevention. CDC Coronavirus Interactive. U.S. Cases Web site. <https://www.cdc.gov/coronavirus-interactive/index.html>. Published 2020. Updated April 18, 2020 5:48PM. Accessed April 18, 2020.
2. Georgia Department of Public Health. Georgia Department of Public Health COVID-19 Daily Status Report. <https://dph.georgia.gov/covid-19-daily-status-report>. Published 2020. Updated May 4, 2020, 7:25:03 PM. Accessed May 4, 2020, 2020.
3. State of Georgia Government. News: Press Releases. <https://gov.georgia.gov/press-releases>. Published 2020. Accessed April 18, 2020, 2020.
4. Vynnycky E, White R. *An Introduction to Infectious Disease Modelling*. Oxford: Oxford University Press; 2010.
5. Li Q, Guan X, Wu P, et al. Early Transmission Dynamics in Wuhan, China, of Novel Coronavirus–Infected Pneumonia. *New England Journal of Medicine*. 2020;382(13):1199-1207.
6. Tsang TK, Wu P, Lin Y, Lau EHY, Leung GM, Cowling BJ. Effect of changing case definitions for COVID-19 on the epidemic curve and transmission parameters in mainland China: a modelling study. *The Lancet Public Health*. 2020.
7. Muniz-Rodriguez K, Fung IC-H, Ferdosi SR, et al. Severe Acute Respiratory Syndrome Coronavirus 2 Transmission Potential, Iran, 2020. *Emerging Infectious Disease journal*. 2020;26(8).
8. Office of Management and Budget. To the heads of Executive Departments and Establishments. In. Washington, D.C.: Executive Office of the President; 2015.
9. Coronavirus (Covid-19) Data in the United States. 2020. <https://github.com/nytimes/covid-19-data>. Accessed April 18, 2020.
10. Chowell G. Fitting dynamic models to epidemic outbreaks with quantified uncertainty: A primer for parameter uncertainty, identifiability, and forecasts. *Infectious Disease Modelling*. 2017;2(3):379-398.
11. Viboud C, Simonsen L, Chowell G. A generalized-growth model to characterize the early ascending phase of infectious disease outbreaks. *Epidemics*. 2016;15:27-37.
12. Nishiura H, Linton NM, Akhmetzhanov AR. Serial interval of novel coronavirus (COVID-19) infections. *International Journal of Infectious Diseases*. 2020;93:284-286.
13. You C, Deng Y, Hu W, et al. Estimation of the Time-Varying Reproduction Number of COVID-19 Outbreak in China. *medRxiv*. 2020:2020.2002.2008.20021253.
14. Gunzler D, Sehgal AR. Time-Varying COVID-19 Reproduction Number in the United States. *medRxiv*. 2020:2020.2004.2010.20060863.
15. Surgo Foundation. The COVID-19 Community Vulnerability Index (CCVI). Surgo Foundation. <https://precisionforcovid.org/ccvi?fbclid=IwAR0VsJVvj-RBnwEC62iJb32R1ZTVnWE0yT1H7SfUXeyF3JEBEKn69sY7JR>. Published 2020. Accessed April 27, 2020, 2020.

**Figure 1.** Timeline for social distancing measures implemented by local county governments and state government in Georgia, USA up to April 23, 2020.

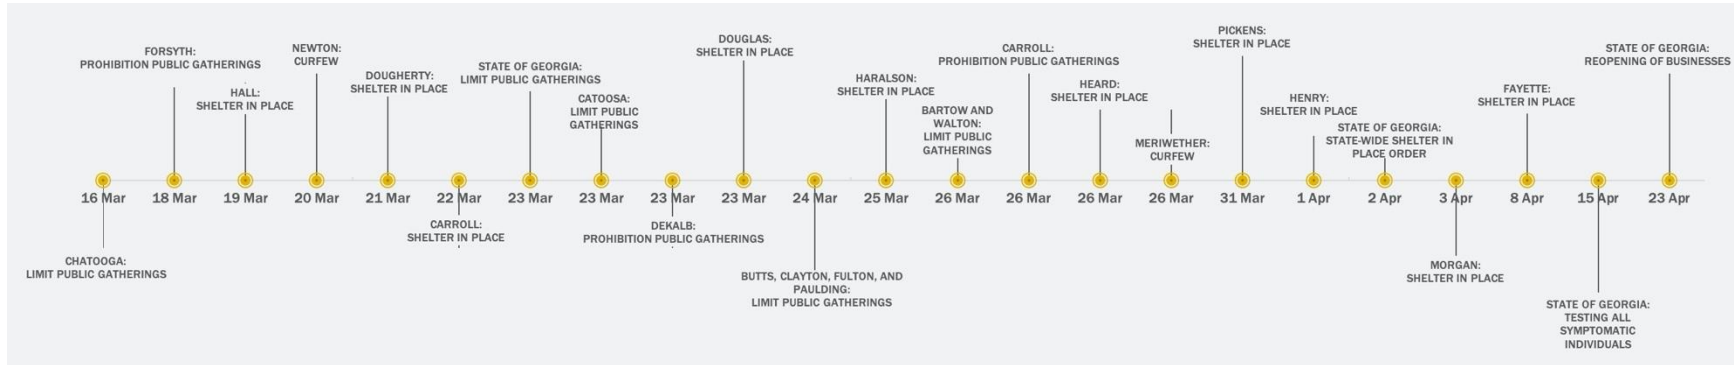

**Figure 2.** Effective reproductive number estimates calculated using the Generalized Growth Model method for Georgia, USA up to May 2, 2020. Estimates for the growth rate with data collected up to April 18, 2020 (black diamonds and black lines) and data analyzed up to May 2, 2020 (red circles and red lines). The vertical black line highlights where the  $Re = 1$ .

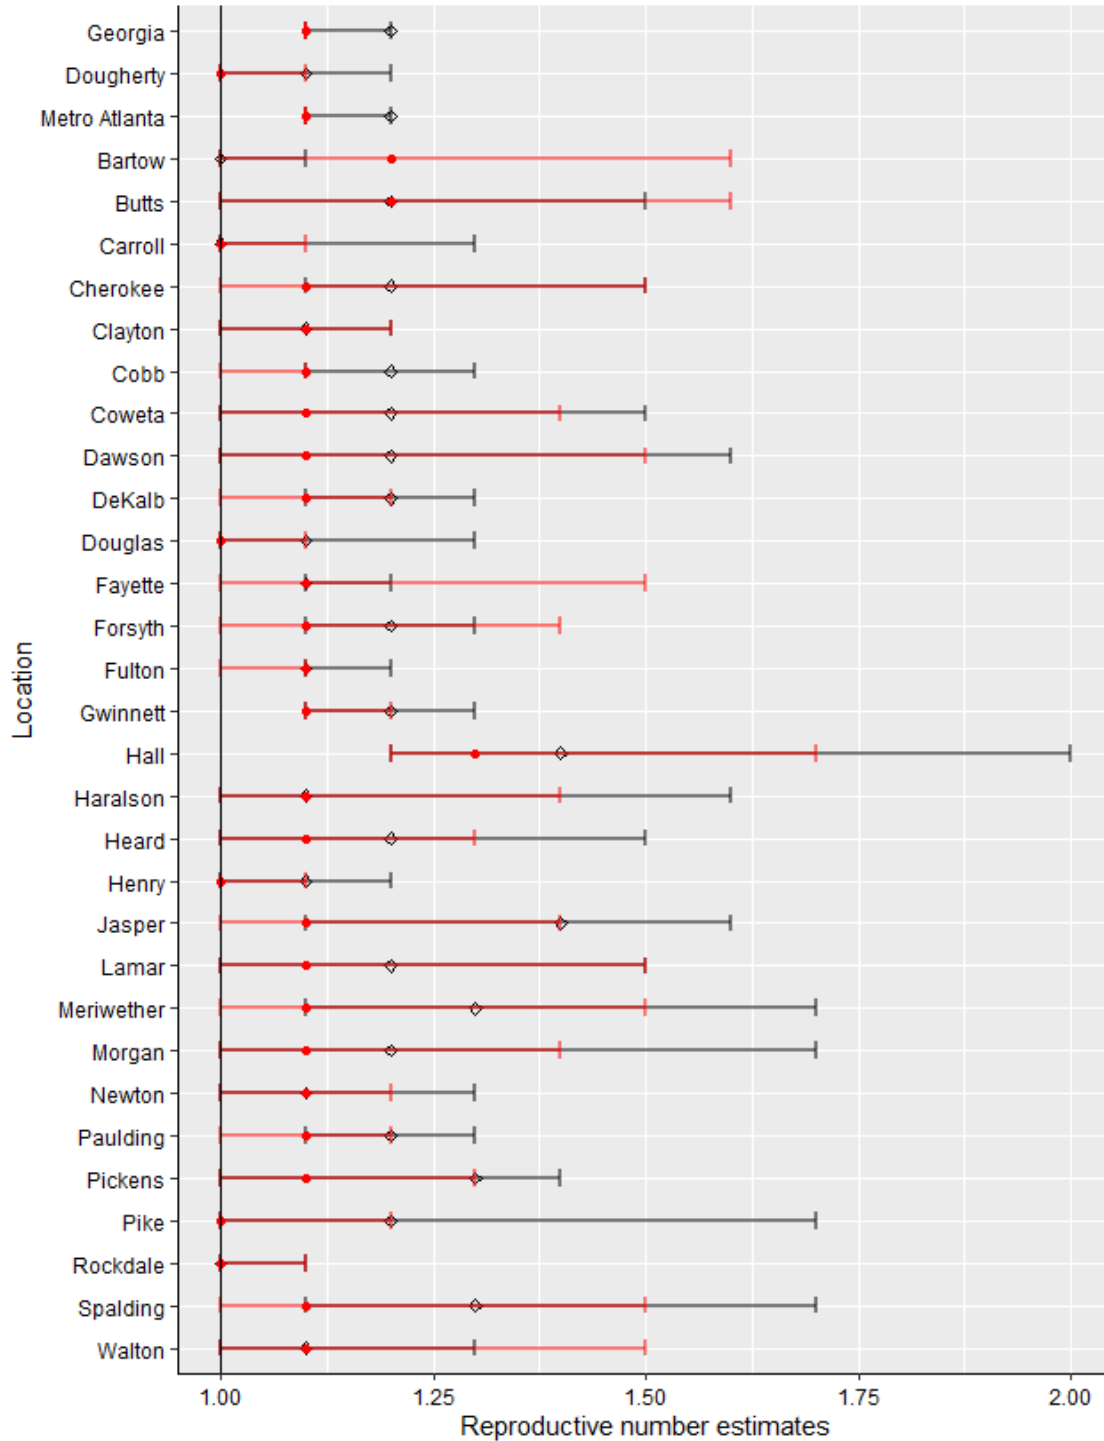

Source: https://medrxiv.org/content/10.1101/2020.05.19.20107219v1.full.pdf
